# Supplementary material for: Clinical utility of expanded carrier screening: results-guided actionability and outcomes
Source: PubMed Central journal article supplement (PMC6752268; doi:10.1038/s41436-018-0321-0), 2018-10-11
Supplement: 41436_2018_321_MOESM3_ESM.pdf [file 41436_2018_321_MOESM3_ESM.pdf]

Supplementary Table 2. Outcomes of pregnancies found by PNDx to be affected, with condition listed.

|                                                                                           | Total pregnancies,<br>n | Pregnancy during which ECS results were received,<br>n | Pregnancies conceived after ECS results were received,<br>n |
|-------------------------------------------------------------------------------------------|-------------------------|--------------------------------------------------------|-------------------------------------------------------------|
| Affected pregnancies                                                                      | 32                      | 20                                                     | 12                                                          |
| Terminated (%)                                                                            | 17 (53)                 | 8 (40)                                                 | 9 (75)                                                      |
| Congenital adrenal hyperplasia                                                            | 1                       | -                                                      | 1                                                           |
| Cystic fibrosis                                                                           | 4                       | 2                                                      | 2                                                           |
| Fragile X syndrome                                                                        | 2                       | 1                                                      | 1                                                           |
| GJB2-related DFNB1 nonsyndromic hearing loss and deafness                                 | 2                       | 1                                                      | 1                                                           |
| HADHA-related disorders (including Long Chain 3-Hydroxyacyl-CoA Dehydrogenase Deficiency) | 1                       | 1                                                      | -                                                           |
| Hypophosphatasia (autosomal recessive)                                                    | 1                       | -                                                      | 1                                                           |
| LAMA2-related muscular dystrophy                                                          | 1                       | 1                                                      | -                                                           |
| Niemann-Pick disease type C                                                               | 2                       | 1                                                      | 1                                                           |
| Phenylalanine hydroxylase deficiency                                                      | 1                       | 1                                                      | -                                                           |
| Pompe disease                                                                             | 1                       | -                                                      | 1                                                           |
| Spinal muscular atrophy                                                                   | 2                       | -                                                      | 2                                                           |
| Live birth (%)                                                                            | 11 (34)                 | 8 (40)                                                 | 3 (25)                                                      |
| Cystic fibrosis                                                                           | 1                       | 1                                                      | -                                                           |
| Congenital adrenal hyperplasia                                                            | 1                       | 1                                                      | -                                                           |
| Congenital adrenal hypoplasia                                                             | 1                       | 1                                                      | -                                                           |
| Fragile X syndrome                                                                        | 5                       | 2                                                      | 3                                                           |
| GJB2-related DFNB1 nonsyndromic hearing loss and deafness                                 | 1                       | 1                                                      | -                                                           |
| Pompe disease                                                                             | 1                       | 1                                                      | -                                                           |
| Spinal muscular atrophy                                                                   | 1                       | 1                                                      | -                                                           |
| Not born yet (%)                                                                          | 3 (9.4)                 | 3 (15)                                                 | 0 (0)                                                       |
| Congenital adrenal hyperplasia                                                            | 1                       | 1                                                      | -                                                           |
| Medium chain acyl-CoA dehydrogenase deficiency                                            | 1                       | 1                                                      | -                                                           |
| Unknown <sup>a</sup>                                                                      | 1                       | 1                                                      | -                                                           |
| Stillborn (%)                                                                             | 1 (3.1)                 | 1 (5.0)                                                | 0 (0)                                                       |
| PKHD1-related autosomal recessive polycystic kidney disease                               | 1                       | 1                                                      | -                                                           |
| Miscarried (%)                                                                            | 0 (0)                   | 0 (0)                                                  | 0 (0)                                                       |

a. 1 at-risk couple (ARC) could not recall the condition for which the pregnancy was found to be affected.
